# Supplementary material for: Anionic polycondensation and equilibrium driven monomer formation of cyclic aliphatic carbonates
Source: Royal Society of Chemistry journal article supplement (doi:10.1039/c8ra08219g), 2018-01-01
Supplement: c8ra08219g1.pdf [file c8ra08219g1.pdf]

## Electronic supplementary information (ESI)

Anionic polycondensation and equilibrium driven monomer formation of cyclic aliphatic carbonates

Geng Hua,<sup>a</sup> Peter Olsén,<sup>a</sup> Johan Franzén<sup>b</sup> and Karin Odelius<sup>a,\*</sup>

a. Department of Fibre and Polymer Technology, KTH Royal Institute of Technology, SE-100 44, Stockholm, Sweden

b. Department of Chemistry, KTH Royal Institute of Technology, SE-100 44, Stockholm, Sweden

\*Corresponding author: K.O. [hoem@kth.se](mailto:hoem@kth.se), +46-8 790 80 76

This ESI contains 9 figures in 10 pages.

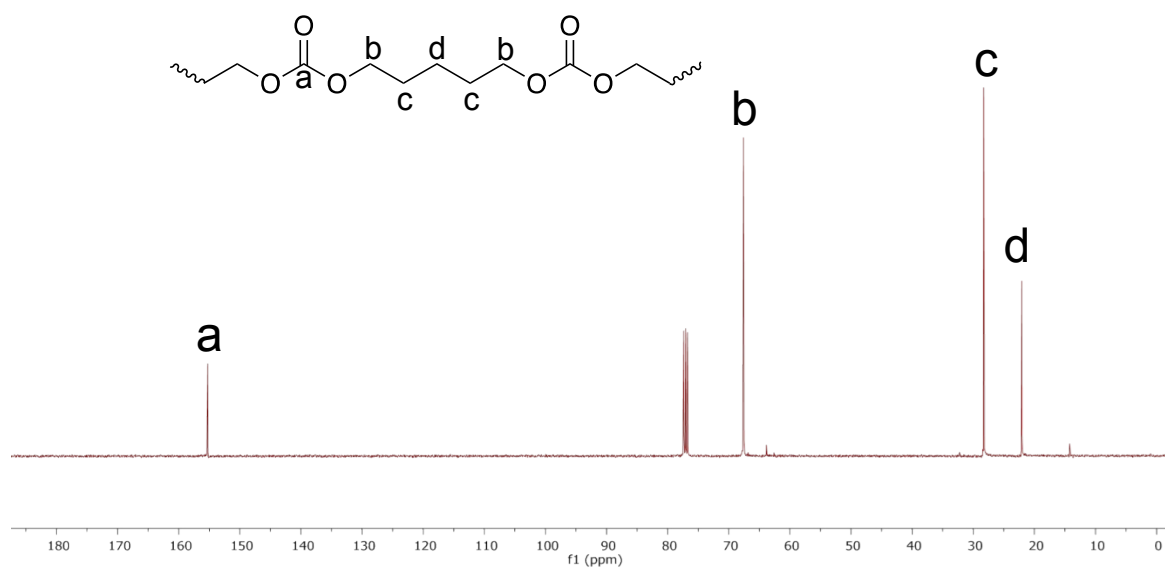

Figure S1  $^{13}\text{C}$ -NMR of the condensation product between 1,5-pentandiol and diethyl carbonate. The peak at 155.2 ppm represents the carbonate moiety in the condensation product.

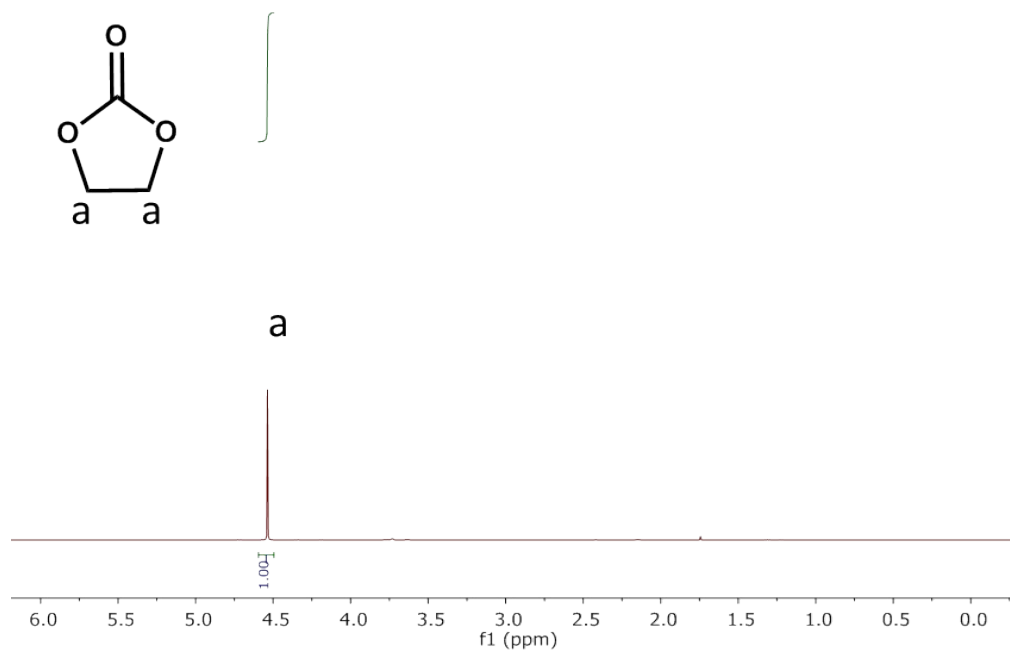

Figure S2 <sup>1</sup>H-NMR of 1,3-dioxolan-2-one. (5CC-1B)<sup>1</sup>

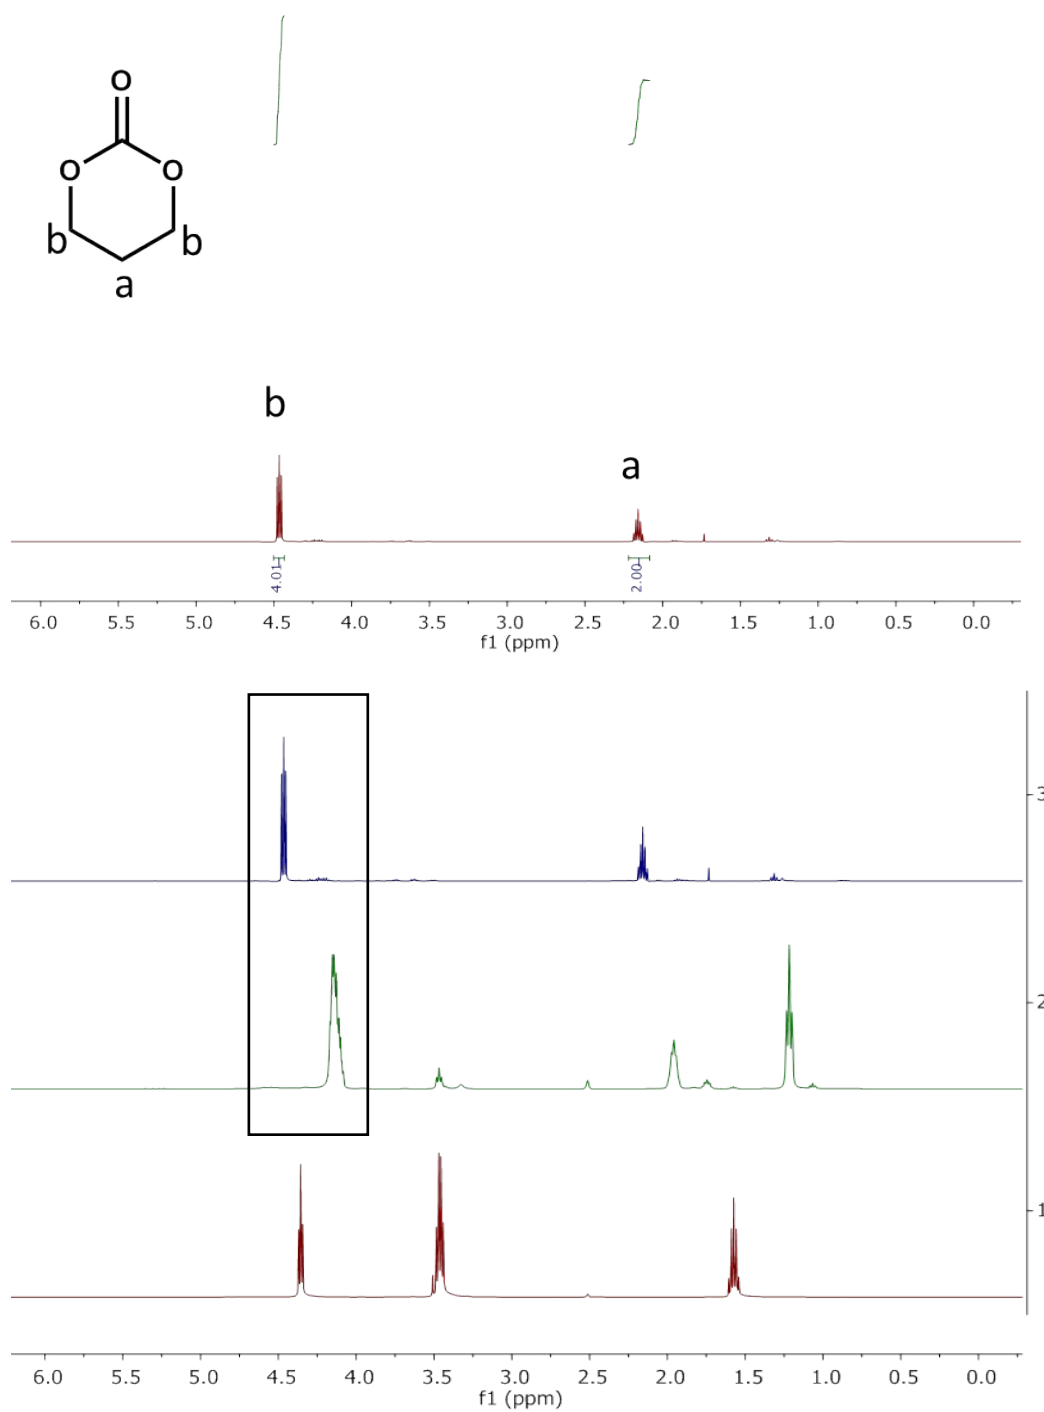

Figure S3 Upper, <sup>1</sup>H-NMR of 1,3-dioxan-2-one (6CC-1B).<sup>2</sup> Lower, <sup>1</sup>H-NMR compilation of 1) 1,3-propanediol, 2) oligomers prior to cRCD and 3) 1,3-dioxan-2-one.

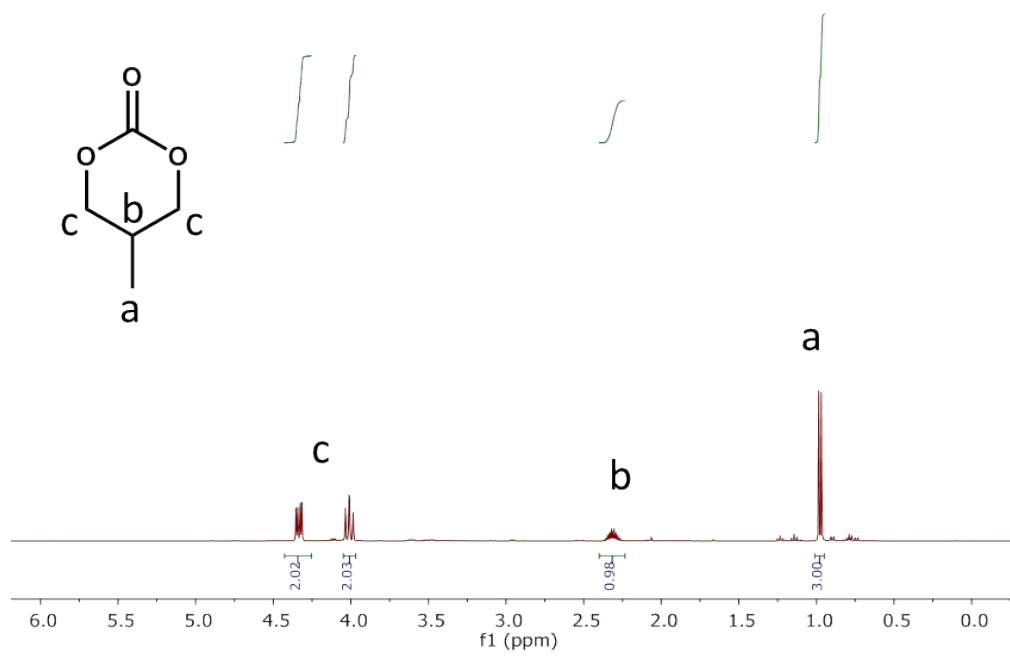

Figure S4 <sup>1</sup>H-NMR of 5-methyl-1,3-dioxan-2-one (6CC-2B).<sup>3</sup>

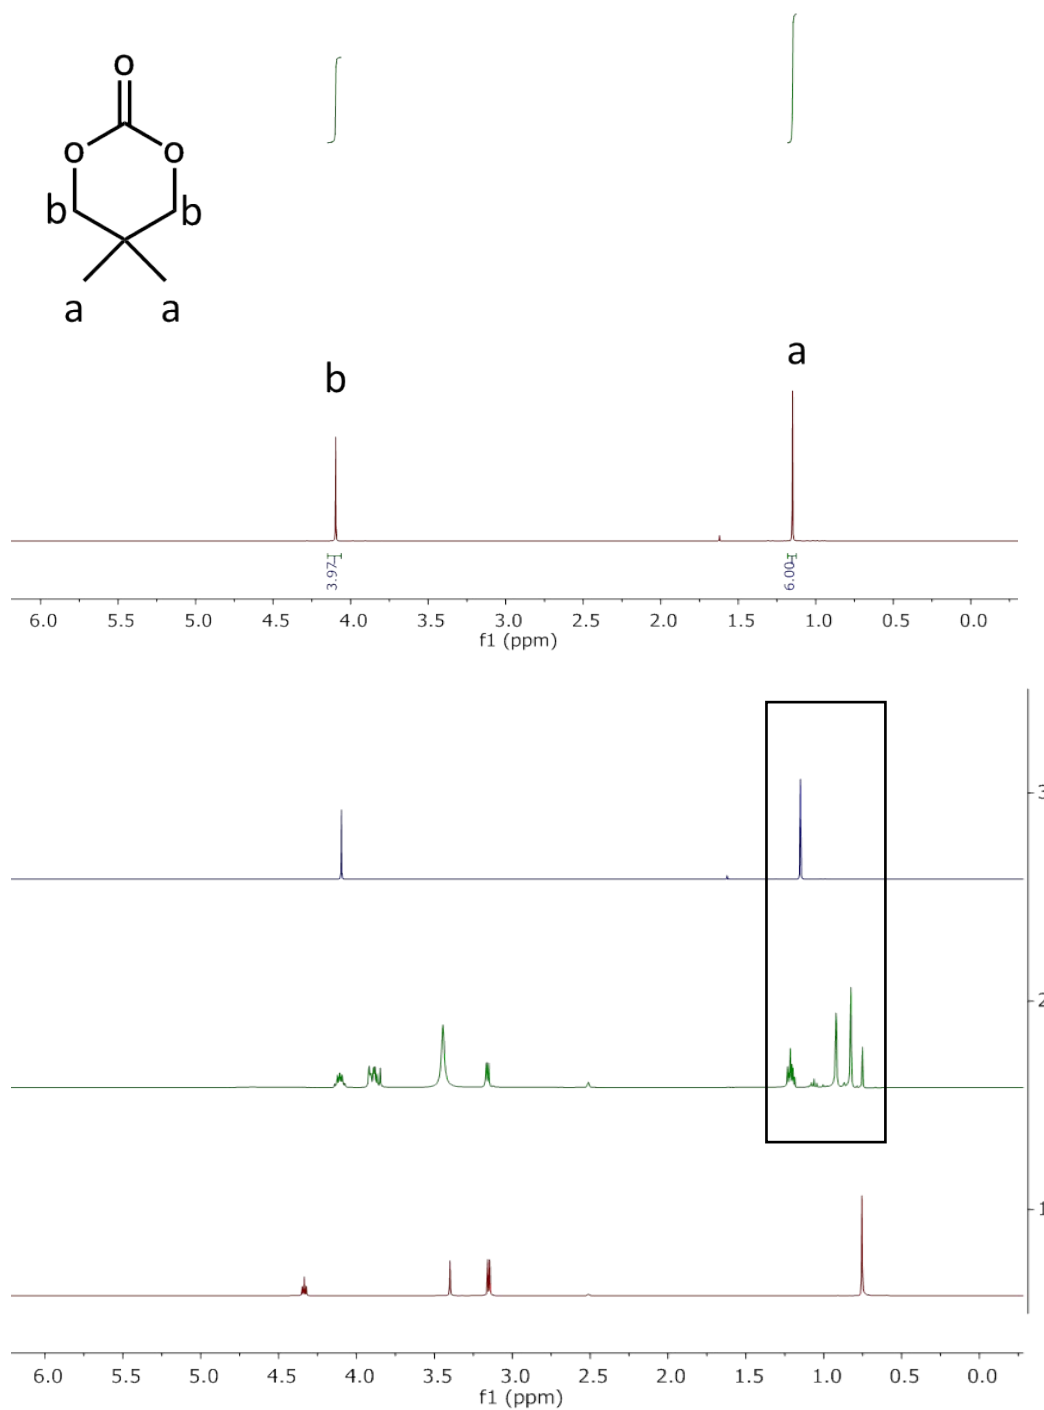

Figure S5 <sup>1</sup>H-NMR of 5,5-dimethyl-1,3-dioxan-2-one (6CC-3B).<sup>2</sup> Lower, <sup>1</sup>H-NMR compilation of 1) 2,2-dimethyl-1,3-propanediol, 2) oligomers prior to cRCD and 3) 5,5-dimethyl-1,3-dioxan-2-one.

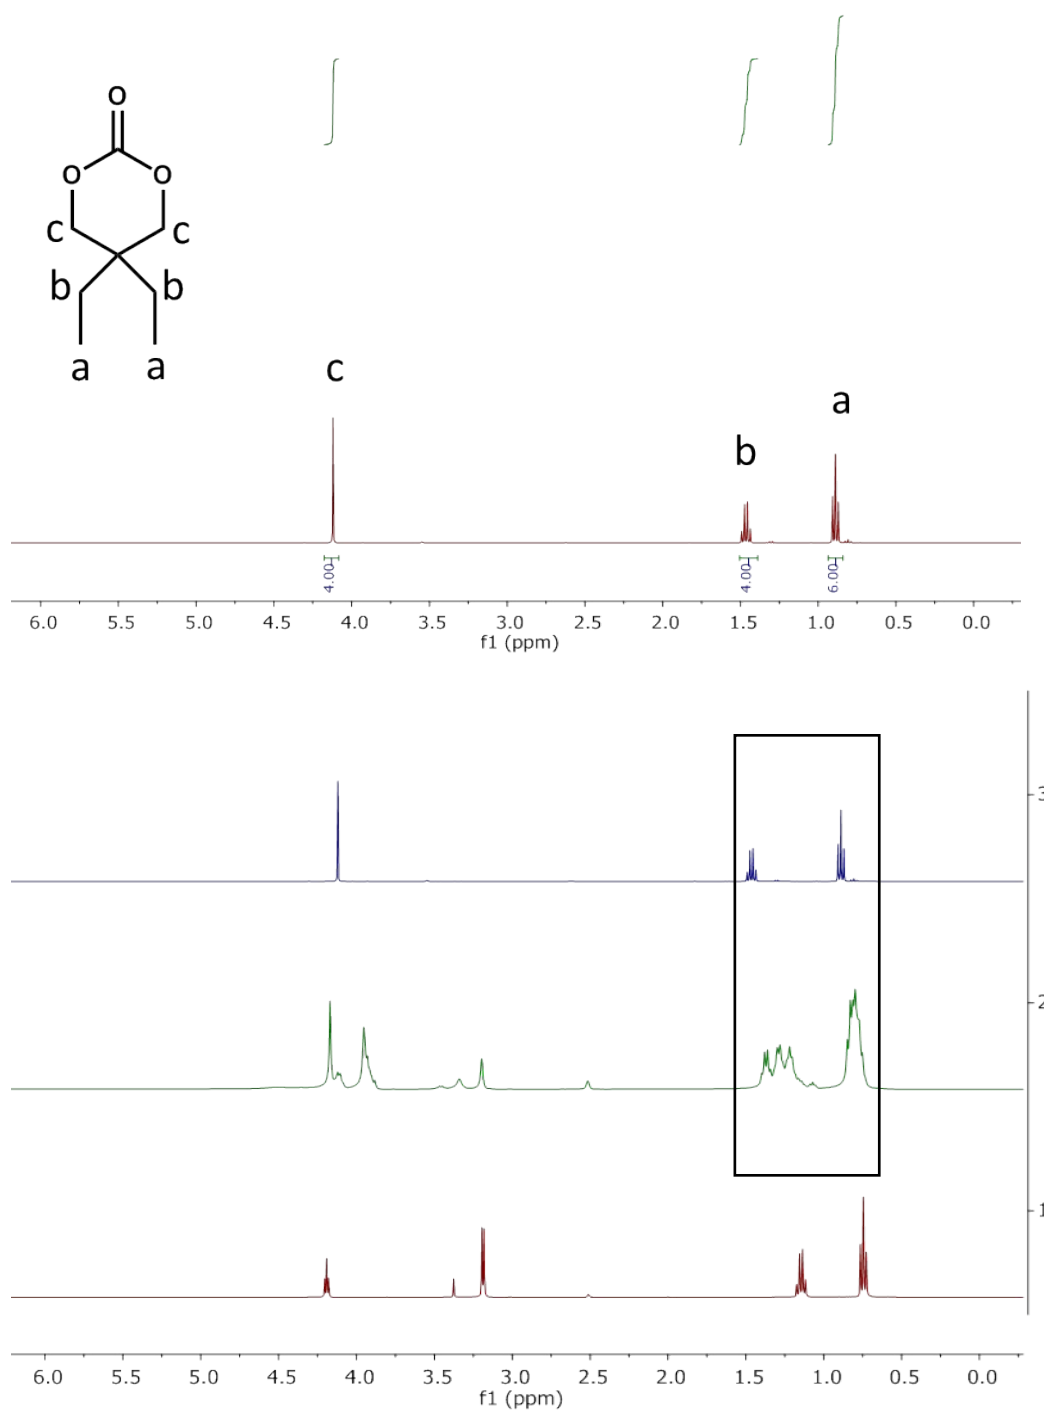

Figure S6 <sup>1</sup>H-NMR of 5,5-diethyl-1,3-dioxan-2-one (6CC-4B).<sup>4</sup> Lower, <sup>1</sup>H-NMR compilation of 1) 2,2-diethyl-1,3-propanediol, 2) oligomers prior to cRCD and 3) 5,5-diethyl-1,3-dioxan-2-one.

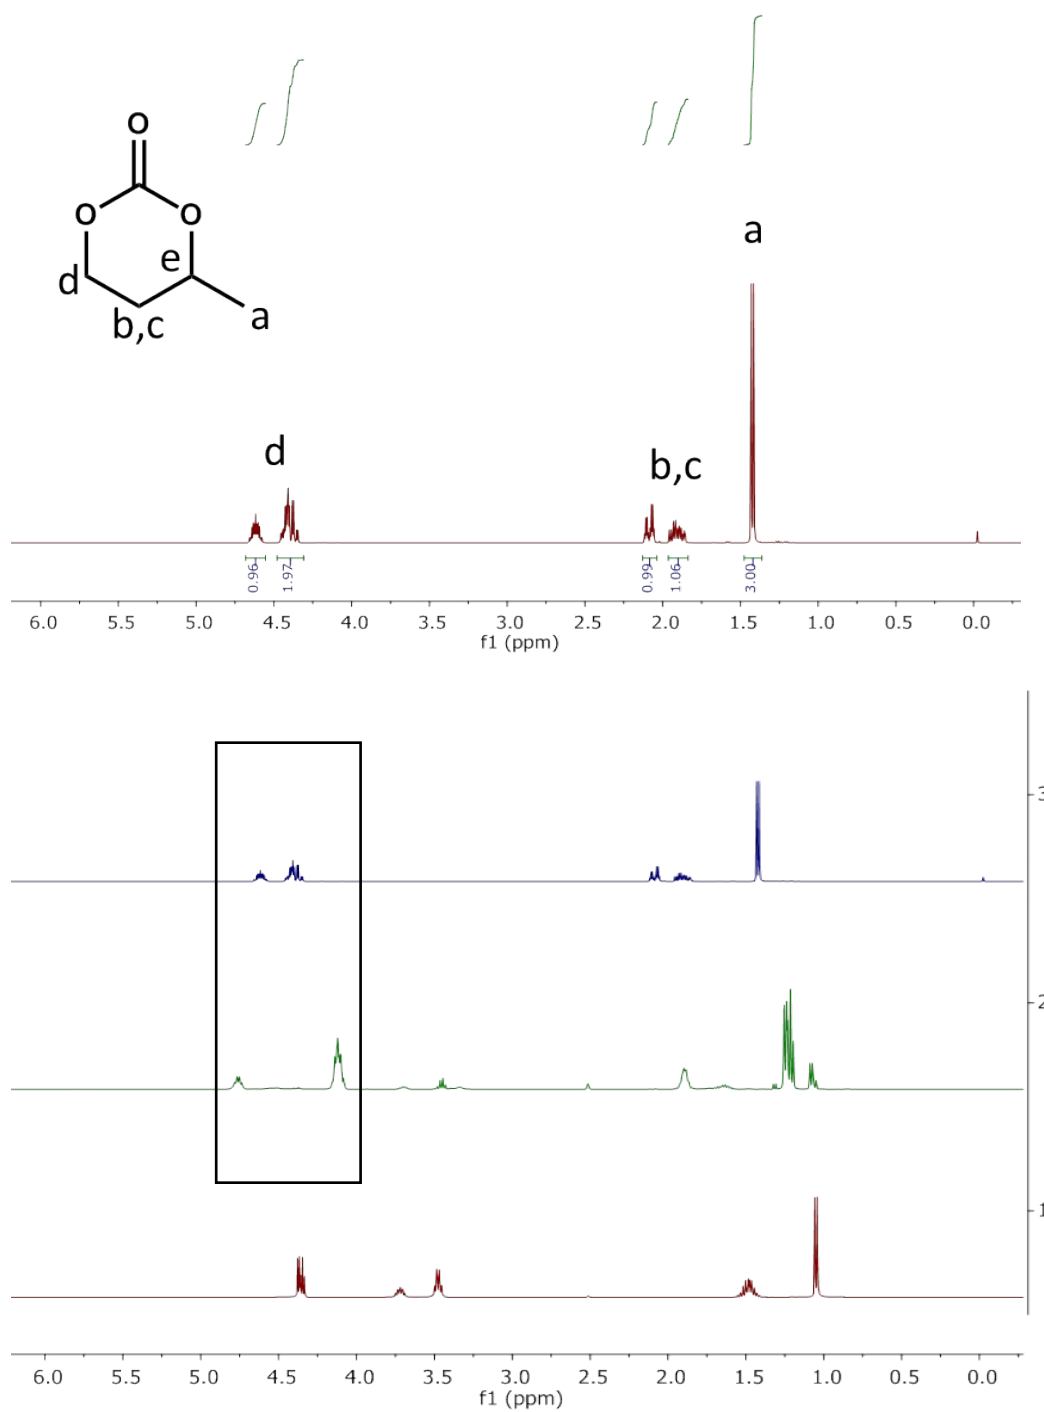

Figure S7 <sup>1</sup>H-NMR of 4-methyl-1,3-dioxan-2-one (6CC-5B).<sup>5</sup> Lower, <sup>1</sup>H-NMR compilation of 1) (±)-1,3-butanediol, 2) oligomers prior to cRCD and 3) 4-methyl-1,3-dioxan-2-one.



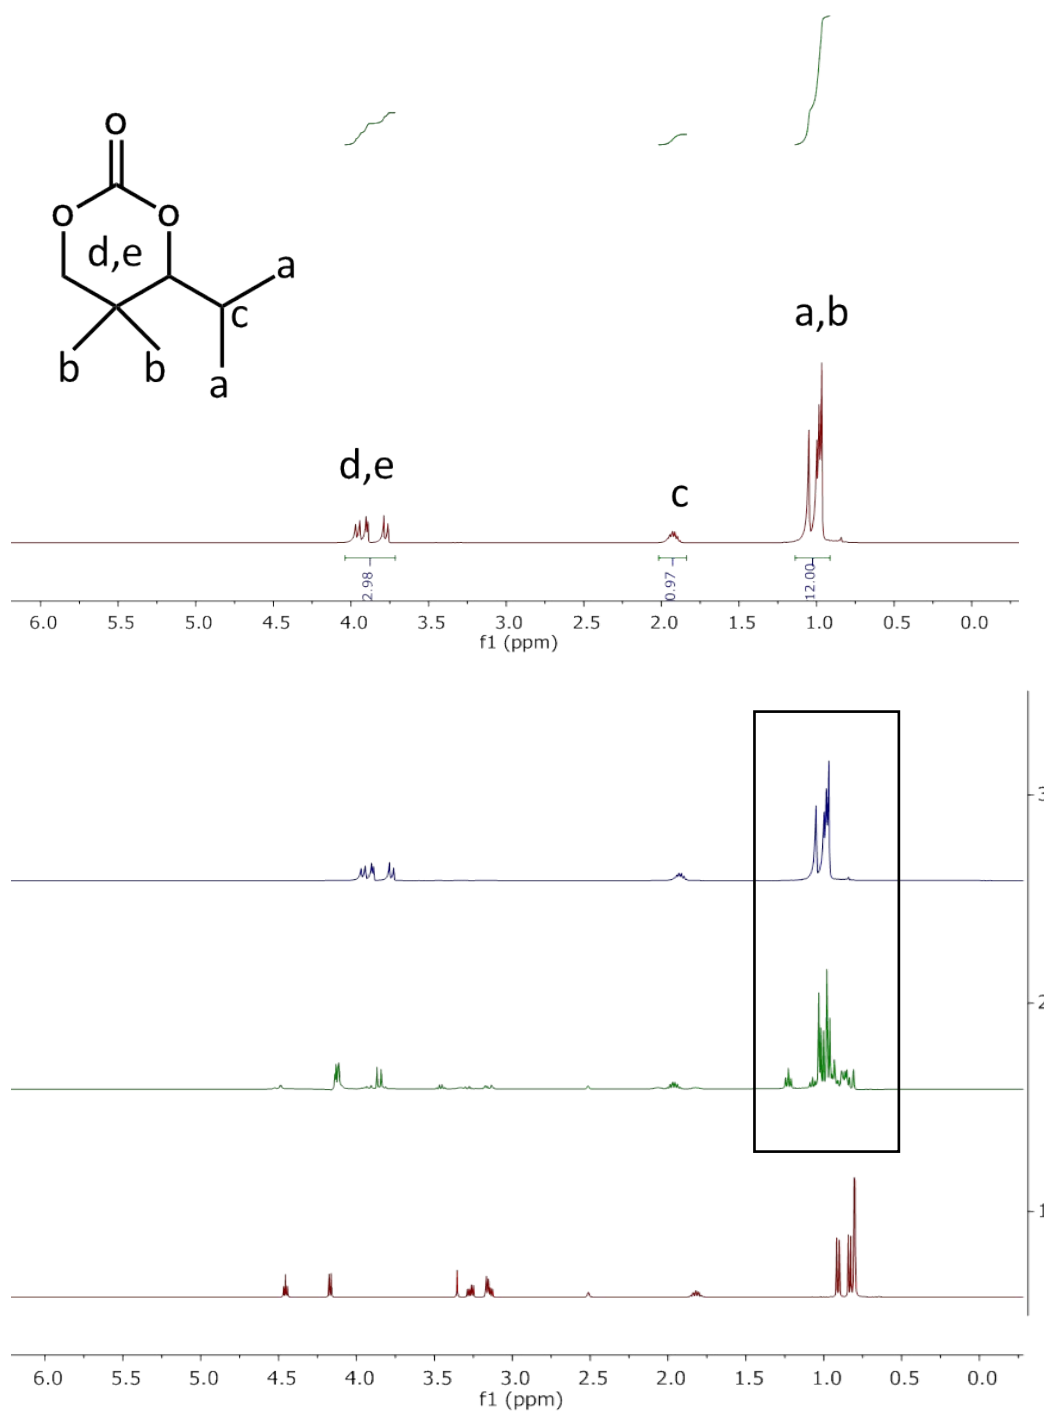

Figure S8 <sup>1</sup>H-NMR of 4-isopropyl-5,5-dimethyl-1,3-dioxan-2-one (6CC-7B).<sup>6</sup> Lower, <sup>1</sup>H-NMR compilation of 1) 2,2,4-trimethyl-1,3-pentandiol, 2) oligomers prior to cRCD and 3) 4-isopropyl-5,5-dimethyl-1,3-dioxan-2-one.

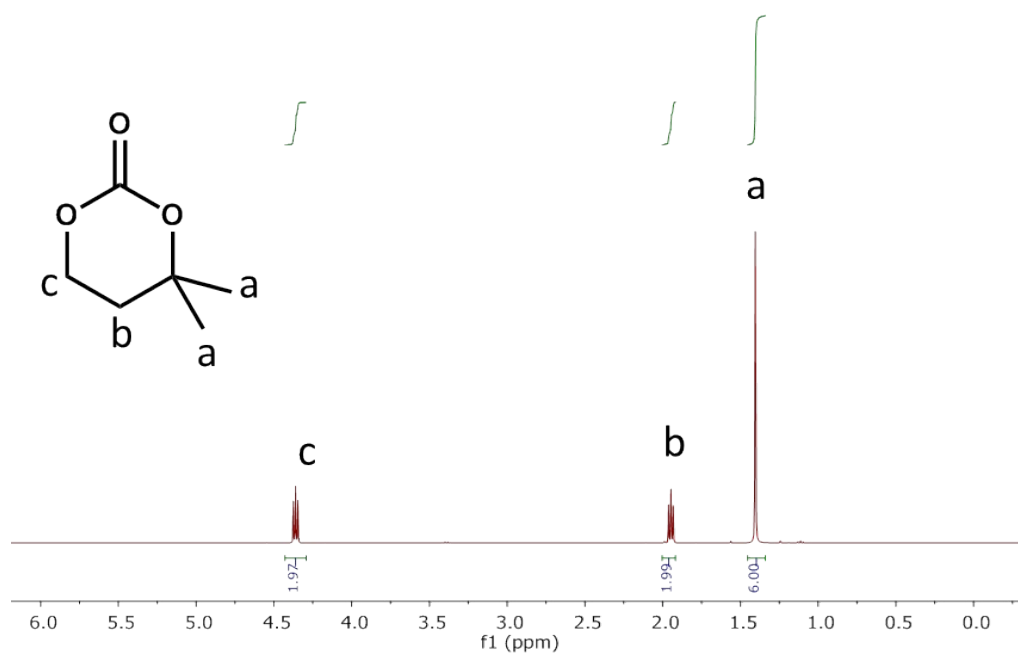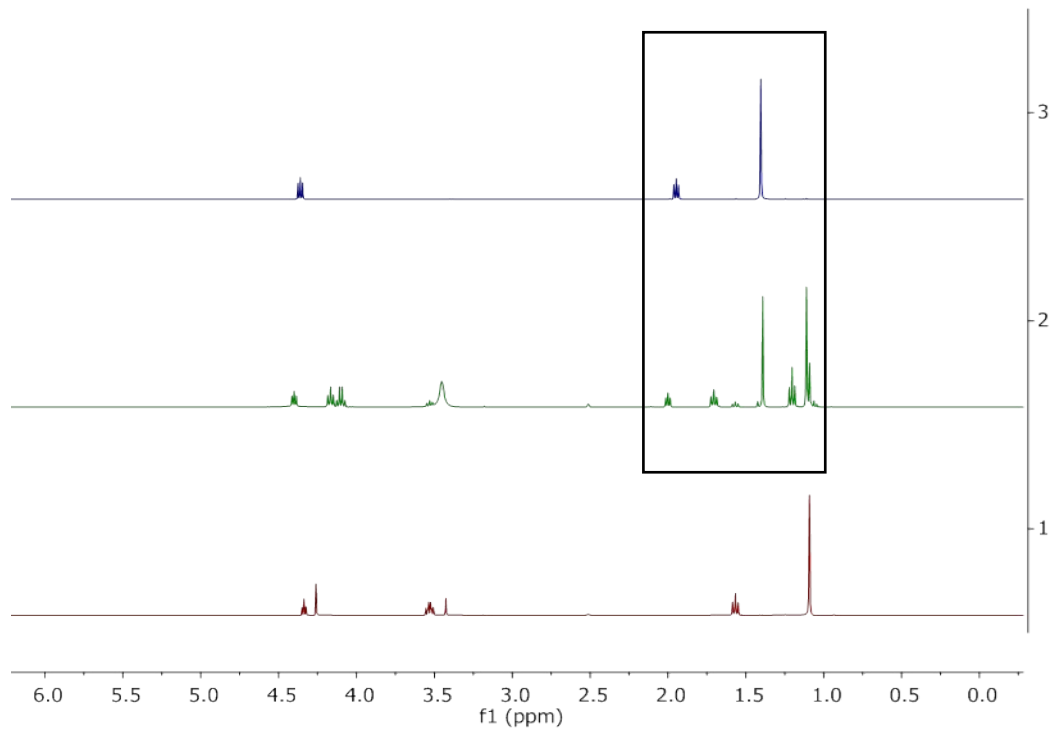

Figure S9 <sup>1</sup>H-NMR of 4,4-dimethyl-1,3-dioxan-2-one (6CC-6B).<sup>3</sup> Lower, <sup>1</sup>H-NMR compilation of 1) 3-methyl-1,3-butanediol, 2) oligomers prior to cRCD and 3) 4,4-dimethyl-1,3-dioxan-2-one.

## References

- 1 Y. L. Hu and R. Xing, *Catal. Letters*, 2017, **147**, 1453–1463.
- 2 J. Rintjema, W. Guo, E. Martin, E. C. Escudero-Adán and A. W. Kleij, *Chem. - A Eur. J.*, 2015, **21**, 10754–10762.
- 3 S. H. Pyo and R. Hatti-Kaul, *Adv. Synth. Catal.*, 2016, **358**, 834–839.
- 4 T. F. Al-Azemi, H. H. Dib, N. A. Al-Awadi and O. M. E. El-Dusouqui, *Tetrahedron*, 2008, **64**, 4126–4134.
- 5 P. Brignou, J.-F. Carpentier and S. M. Guillaume, *Macromolecules*, 2011, **44**, 5127–5135.
- 6 Z.-H. Zhou, Q.-W. Song and L.-N. He, *ACS Omega*, 2017, **2**, 337–345.
